# Supplementary material
Source: publisher figshare collection journal article supplement (https://acs.figshare.com/ndownloader/files/13788419)
Supplement: Supplementary file 1 [file 13788419]

# Supporting Information

5 pages

12 figures

Hydrolytic degradation of PCL-PLLA semi-IPNs exhibiting rapid, tunable degradation

*Lindsay N. Woodard<sup>1</sup> and Melissa A. Grunlan<sup>1,2,3\*</sup>*

<sup>1</sup>Department of Biomedical Engineering, Texas A&M University, College Station, Texas 77843, United States.

<sup>2</sup>Department of Materials Science and Engineering, Texas A&M University, College Station, Texas 77843, United States.

<sup>3</sup>Department of Chemistry, Texas A&M University, College Station, Texas 77843, United States.

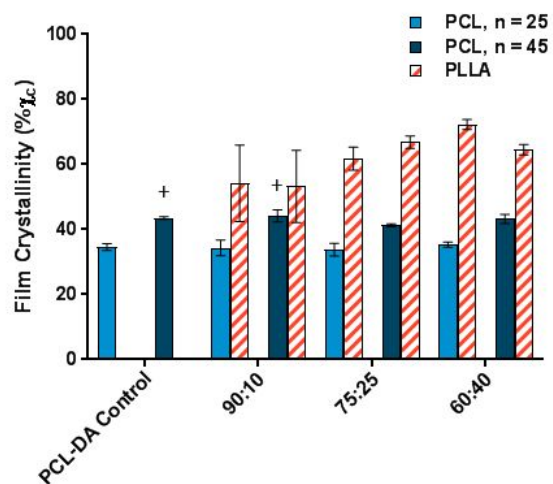

**Fig. S1** PCL and PLLA weight-adjusted % crystallinity (%  $X_c$ ) values for initial PCL-DA control and PCL-PLLA semi-IPN films as quantified from respective DSC curves (<sup>+</sup> $p < 0.05$  vs corresponding PCL-DA ( $n = 25$ ) film).

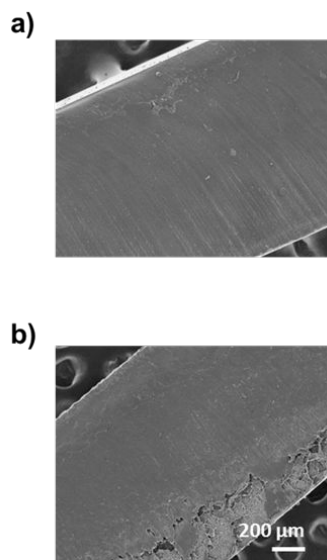

**Fig. S2** SEM images of initial cross-sections for representative (a) PCL-DA ( $n = 45$ ) control and (b) semi-IPN (75:25 [PCL:PLLA wt%;  $n = 45$ ]) films.

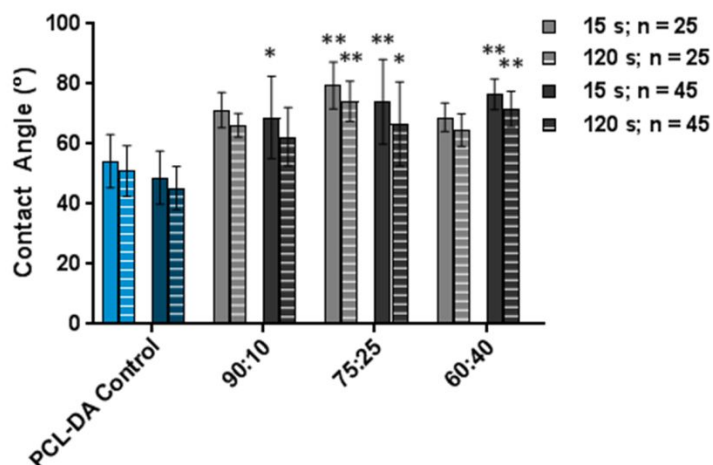

**Fig. S3** Contact angle measurements for initial PCL-DA control and PCL-PLLA semi-IPN films indicating an increased hydrophobicity with PLLA (\* $p < 0.05$ , \*\* $p < 0.01$  vs corresponding PCL-DA control).

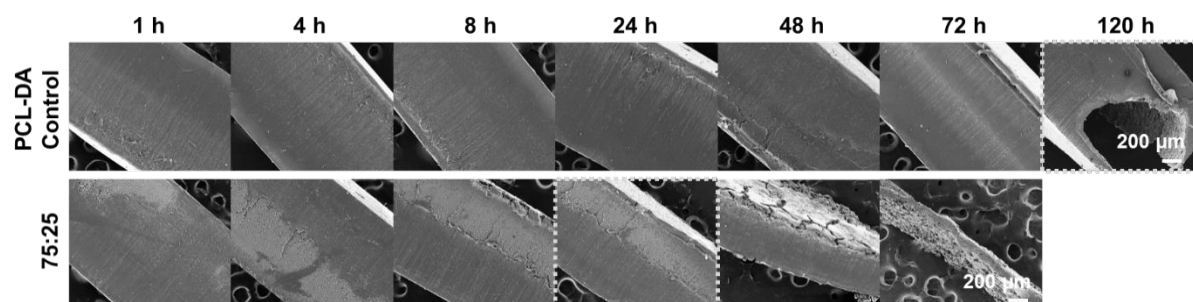

**Fig. S4** SEM images of film cross-sections during accelerated (1 M NaOH, 37 °C) degradation for PCL-DA ( $n = 25$ ) control and PCL-PLLA (75:25 [PCL:PLLA wt%];  $n = 25$ ) semi-IPN films. Films of similar mass loss (~41-54%) are boxed for comparison.

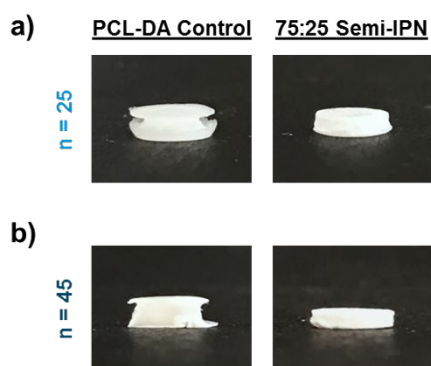

**Fig. S5** Visual comparison of PCL-DA control and PCL-PLLA semi-IPN (75:25 [PCL:PLLA wt%]) cross-sections during accelerated (1 M NaOH, 37 °C) degradation, at similar mass loss (~41-54%; ~71-81%), for films based on (a) PCL-DA ( $n = 25$ ) and (b) PCL-DA ( $n = 45$ ).

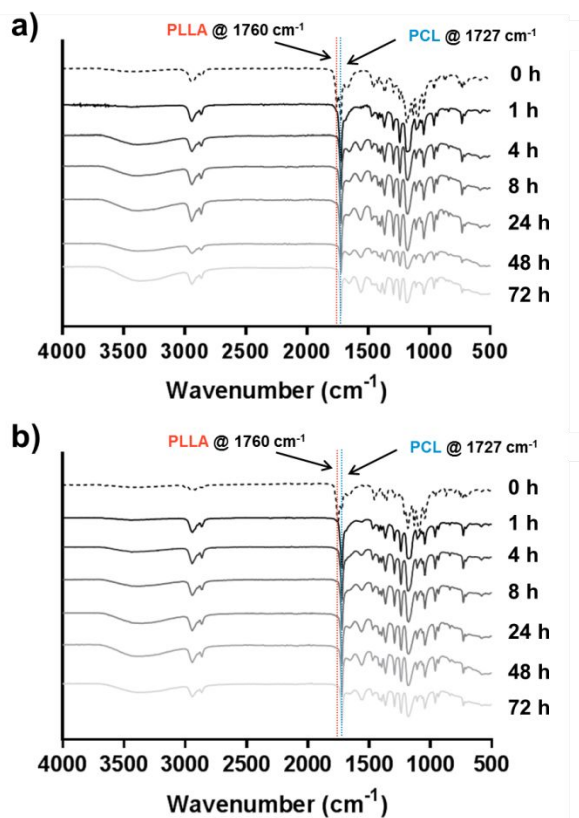

**Fig. S6** ATR-FTIR spectra of PCL-PLLA (75:25 [PCL:PLLA wt%]) semi-IPN film surfaces upon accelerated (1 M NaOH, 37 °C) degradation when based on **(a)** PCL-DA ( $n = 25$ ) and **(b)** PCL-DA ( $n = 45$ ).

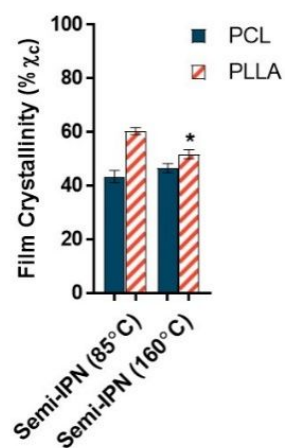

**Fig. S7** Crystallinity comparison for representative 75:25 (PCL:PLLA, wt.%) semi-IPN (PCL-DA  $n = 45$ ) PCL demonstrating reduced PLLA crystallinity in semi-IPN films annealed at 160°C (\* $p < 0.05$ ).

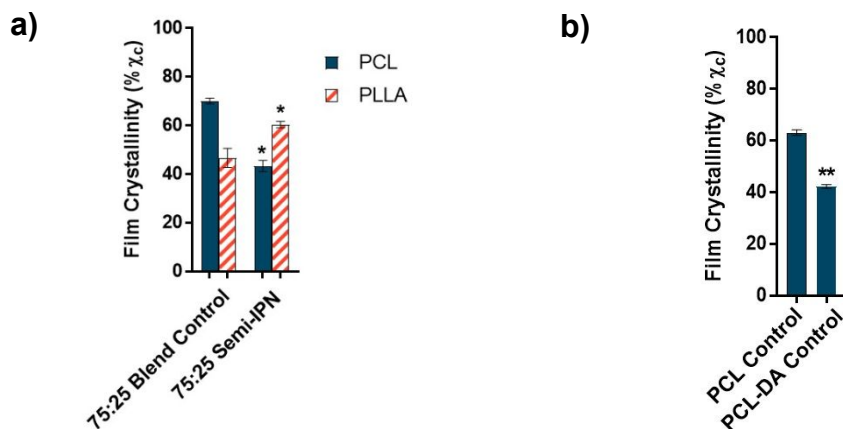

**Fig. S8** Crystallinity comparison (PCL  $n = 45$ ) for **(a)** representative 75:25 (PCL:PLLA, wt.%) showing significantly higher PCL crystallinity (\* $p < 0.05$ ) and reduced PLLA crystallinity (\* $p < 0.05$ ) in blends, and **(b)** showing significantly higher PCL crystallinity in PCL thermoplastic compared to cross-linked PCL-DA (\*\* $p < 0.0001$ )

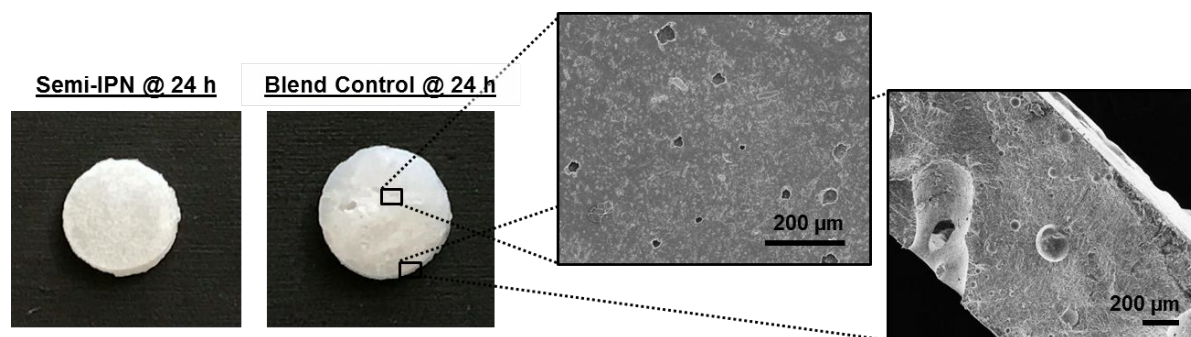

**Fig. S9** Visual, close-up comparison of PCL-PLLA semi-IPN (75:25 [PCL:PLLA wt%]) and blend (75:25 [PCL:PLLA wt%]) control films at 24 h accelerated (1 M NaOH, 37 °C) degradation for representative films based on PCL-DA ( $n = 25$ ).

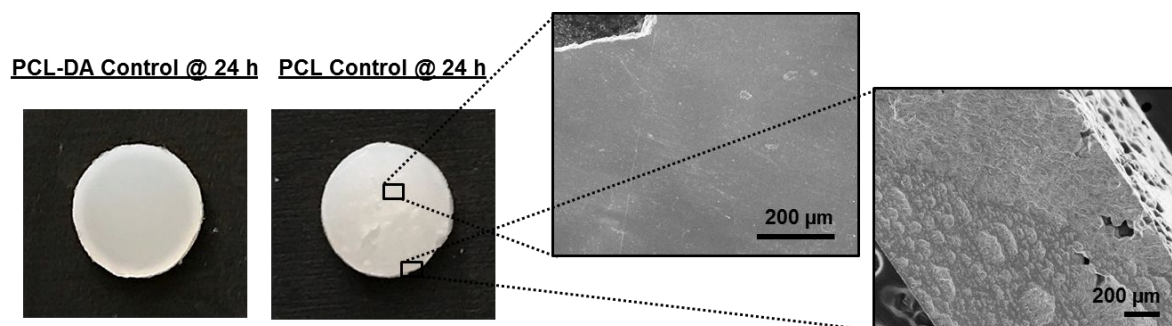

**Fig. S10** Visual, close-up comparison of PCL-DA and PCL control films at 24 h accelerated (1 M NaOH, 37 °C) degradation for representative films based on PCL-DA ( $n = 25$ ).

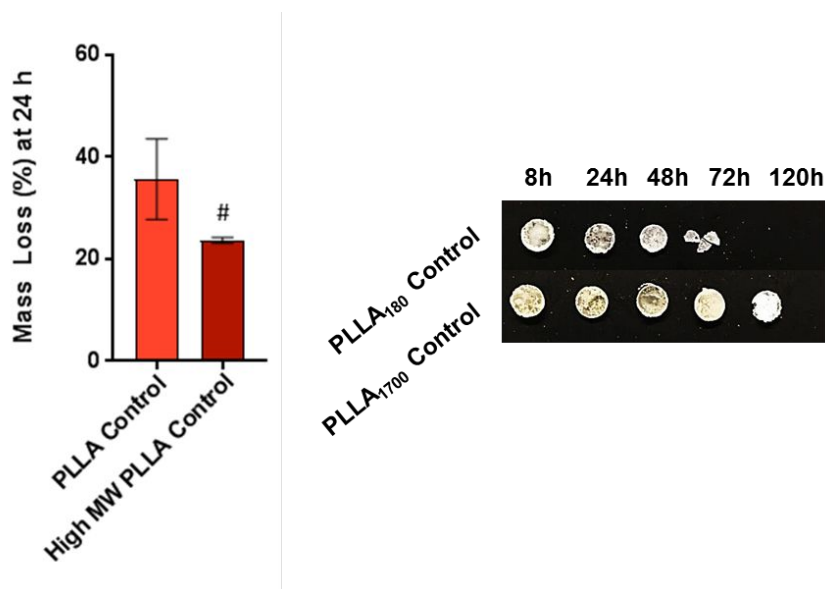

**Fig. S11** The mass loss at 24 h under accelerated conditions (1 M NaOH, 37 °C) and visual degradation of PLLA control and high MW PLLA control films (<sup>#</sup>  $p > 0.05$  vs PLLA control).

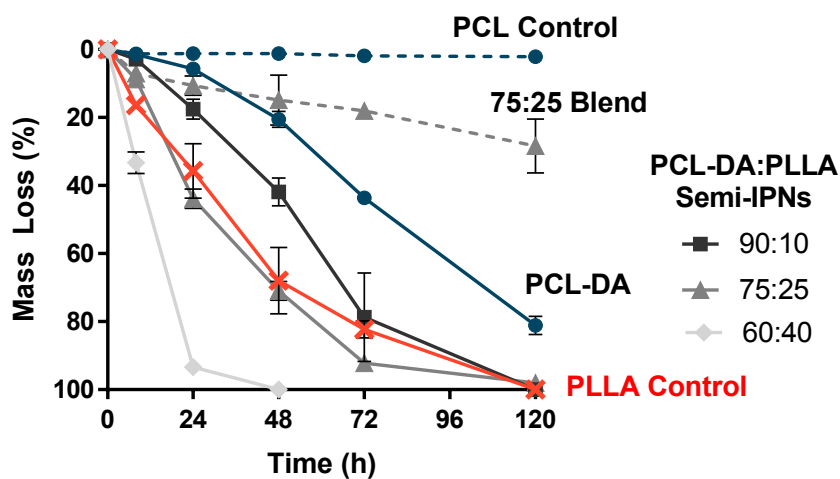

**Fig. S12** The mass loss under accelerated conditions (1 M NaOH, 37 °C) for PCL control (n = 45), PLLA control (m = 90), PCL-DA (n = 45), corresponding blend and semi-IPNs (PCL-DA, n = 45).
